# Supplementary material for: An Integrative View of the Phyllosphere Mycobiome of Native Rubber Trees in the Brazilian Amazon
Source: MDPI journal article supplement (doi:10.3390/jof8040373), 2022-04-06
Supplement: s1 [file s1]

## Supplementary Material 1: Bioinformatics pipelines

### 1. Amplicon Metagenomics

The output files (FASTQ format) of the amplicon metagenomic sequencing of each one of the samples comprise our raw primary data. The bioinformatics pipeline was developed on an Operational System Ubuntu 16.04.5 LTS system. The programs used were: VSEARCH v2.9.1 (Rognes et al., 2016); BLAST v2.2.31+ (Camacho et al., 2009). Scripts in shell (McIlroy, 1987) and Python v3.6 (Martelli, 2006) programming languages were written to make some automatic tasks, such as merging samples or generating the abundance table. The reference database used for fungal taxonomic identification was UNITE v. 7.2 (Nilsson et al., 2010). The pipeline has the following steps, all of which using VSEARCH and BLASTn, as aforementioned: (i) quality and length filtering was done removing sequences smaller than 300 bp and default settings for quality filtering; (ii) dereplication; (iii) detection and removal of chimeric sequences using the UNITE database (uchime\_reference\_dataset\_untrimmed.fasta) and de novo implementation; (iv) clustering sequences with similarity above 97%. All steps above we used VSEARCH software; (v) automatic taxonomic identification with BLASTn; and (vi) generation of the abundance table was built using python script.

#### References:

- Camacho C, Coulouris G, Avagyan V, Ma N, Papadopoulos J, Bealer K, Madden TL. 2009. BLAST+: architecture and applications. *BMC Bioinformatics* 10(1):1–9 DOI 10.1186/1471-2105-10-421.
- Martelli A. 2006. Python in a nutshell: A desktop quick reference. *New York: O'Reilly Media, Inc.*, 738.
- McIlroy MD. 1987. A research UNIX reader: annotated excerpts from the programmer's manual, 1971–1986. *Murray Hill: AT&T Bell Laboratories*.
- Nilsson, R.H., Larsson, K.H., Taylor, A.F.S., Bengtsson-Palme, J., Jeppesen, T.S., Schigel, D., Kennedy, P., Picard, K., Glöckner, F.O., Tedersoo, L. and Saar, I., 2019. The UNITE database for molecular identification of fungi: handling dark taxa and parallel taxonomic classifications. *Nucleic acids research*, 47(D1), pp.D259-D264.

Rognes T, Flouri T, Nichols B, Quince C, Mah F. 2016. VSEARCH: a versatile open source tool for metagenomics. *PeerJ* 2016(10):22 DOI 10.7717/peerj.2584.

Pipeline for metagenomic ITS

This pipeline was elaborated and run on an Ubuntu 16.04.5 LTS system

Programs

- Vsearch v2.9.1

wget <https://github.com/torognes/vsearch/archive/v2.9.1.tar.gz>

- Blast v2.2.31+

sudo apt-get install ncbi-blast+

- Python

sudo apt-get install python

- Perl

sudo apt-get install perl

FASTA file processing

for R in \*\_R1.fastq ; do

vsearch --fastq\_mergepairs \${R} --reverse \${R/\_R1/\_R2} --fastqout merged\${R}.fastq

**\*\*Merge paired-end sequence reads into one sequence.**

vsearch --fastq\_filter merged\${R}.fastq --fastq\_maxee 0.5 --fastq\_minlen 300 --eeout --fasta\_width 0 --fastaout filtered\${R}.fasta

**\*\*Shorten and/or filter the sequences in the given FASTQ file and output the remaining sequences to the FASTQ file specified**

vsearch --derep\_fulllength filtered\${R}.fasta --minuniquesize 2 --strand plus --sizeout --uc dereplicated\${R}.uc --relabel sample\_\${R}id\_ --fasta\_width 0 --output dereplicated\${R}.fasta

**\*\*Merge strictly identical sequences contained in filename. Identical sequences are defined as having the same length and the same string of nucleotides (case insensitive, T and U are considered the same).**

end

Merge all samples

python3 catDerep\_JF.py

Precluster before chimera detection

vsearch --cluster\_size all\_dereplicatedS.fasta --id 0.97 --strand plus --sizein --sizeout --fasta\_width 0 --uc precluster.uc --centroids precluster.fasta

**\*\*Clusterize the fasta sequences in filename, automatically perform a sorting by decreasing sequence abundance beforehand.**

Detect chimeras present in the fasta-formatted (denovo)

vsearch --uchime\_denovo precluster.fasta --sizein --sizeout --fasta\_width 0 --nonchimeras denovo\_nonchimeras.fasta

**\*\*Without external references (i.e. de novo). Automatically sort the sequences in filename by decreasing abundance beforehand (see the sorting section for details). Multithreading is not supported.**

Download UNITE database

<https://unite.ut.ee/repository.php>

Detect chimeras present in the fasta-formatted (reference)

vsearch --uchime\_ref denovo\_nonchimeras.fasta --db uchime\_reference\_dataset\_untrimmed\_28.06.2017.fasta --sizein --sizeout --fasta\_width 0 --nonchimeras ref\_nonchimeras.fasta

**\*\*Detect chimeras present in the fasta-formatted filename by comparing them with reference sequences (option --db). Multithreading is supported.**

Extract all non-chimeric, non-singleton sequences, dereplicated

perl map.pl all\_dereplicatedS.fasta precluster.uc ref\_nonchimeras.fasta >

nonchimeras\_derep.fasta

Extract all non-chimeric, non-singleton sequences in each sample

```
perl map.pl dereplicatedS.fasta ll_dereplicatedS.uc nonchimeras_derep.fasta >
```

all\_nonchimeras\_derep.fasta

Clustering

```
vsearch --cluster_size all_nonchimeras_derep.fasta --id 0.97 --sizein --sizeout
```

```
--fasta_width 0 --relabel otu_ --uc otus.uc --centroids otus.fasta
```

**\*\*Clusterize the fasta sequences in filename, automatically perform a sorting by decreasing sequence abundance beforehand.**

Identification OTUs usando BLAST

```
blastn --db base -qcov_hsp_perc 90.0 -perc_identity 97.0 -query otus.fasta
```

```
-outfmt '6 qseqid stitle pident qcovhsp' -out taxonomy.blast
```

**\*\*BLASTn was used to compare the reads with the in house reference fungal BLAST database. Only sequences with at least 97% similarity and at least 90% coverage were identified. OTUs with  $\geq 98,5\%$  of similarity was assigned to species level and similarities between 97 and 98,5% was assigned to genus level.**

Generating the Abundances Table

```
python abund.py
```

**\*\*We used a script written in python to parse the identification output and generate a table in CSV (Comma-Separated Values) format**

Some flags used:

```
--fastq_minlen~positive integer
```

With the --fastq\_filter and --fastq\_mergepairs commands, discard sequences with less than the specified number of bases (default 1).

```
--fastq_maxee~real
```

With the --fastq\_filter and --fastq\_mergepairs commands, discard sequences with more than the specified number of expected errors.

```
--fasta_width~positive integer
```

Fasta files produced by vsearch are wrapped (sequences are written on lines of integer nucleotides, 80 by default). Set that value to 0 to eliminate the wrapping.

```
--minuniquesize~positive integer
```

Discard sequences with an abundance value smaller than integer.

```
--relabel string
```

Please see the description of the same option under Chimera detection for details.

```
--sizein
```

Take into account the abundance annotations present in the input fasta file (search for the pattern "[>:]size=integer[;]" in sequence headers).

```
--sizeout
```

Add abundance annotations to the output fasta file (add the pattern ";size=integer;" to sequence headers). If --sizein is specified, each unique sequence receives a new abundance value corresponding to its total abundance (sum of the abundances of its occurrences). If --sizein is not specified, input abundances are set to 1, and each unique sequence receives a new abundance value corresponding to its number of occurrences in the input file.

Rules for identification of fungal OTUs:

```
if (similarity >= 97):  
    return genus          #genus  
elif (similarity < 97) and (similarity >= 95):  
    return family        #family  
elif (similarity < 95) and (similarity >= 90):  
    return order         #order  
elif (similarity < 90) and (similarity >= 85):  
    return class         #class  
elif (similarity < 85) and (similarity >= 80):  
    return phylo         #phylum  
elif (dado_id < 80):  
    return kingdom       #kingdom  
end
```
